# Supplementary material for: Fgf-driven Tbx protein activities directly induce myf5 and myod to initiate zebrafish myogenesis
Source: Oxford University Press journal article supplement (doi:10.1242/dev.184689), 2020-04-15
Supplement: dev184689supp.pdf [file dev184689supp.pdf]

## Fig. S1

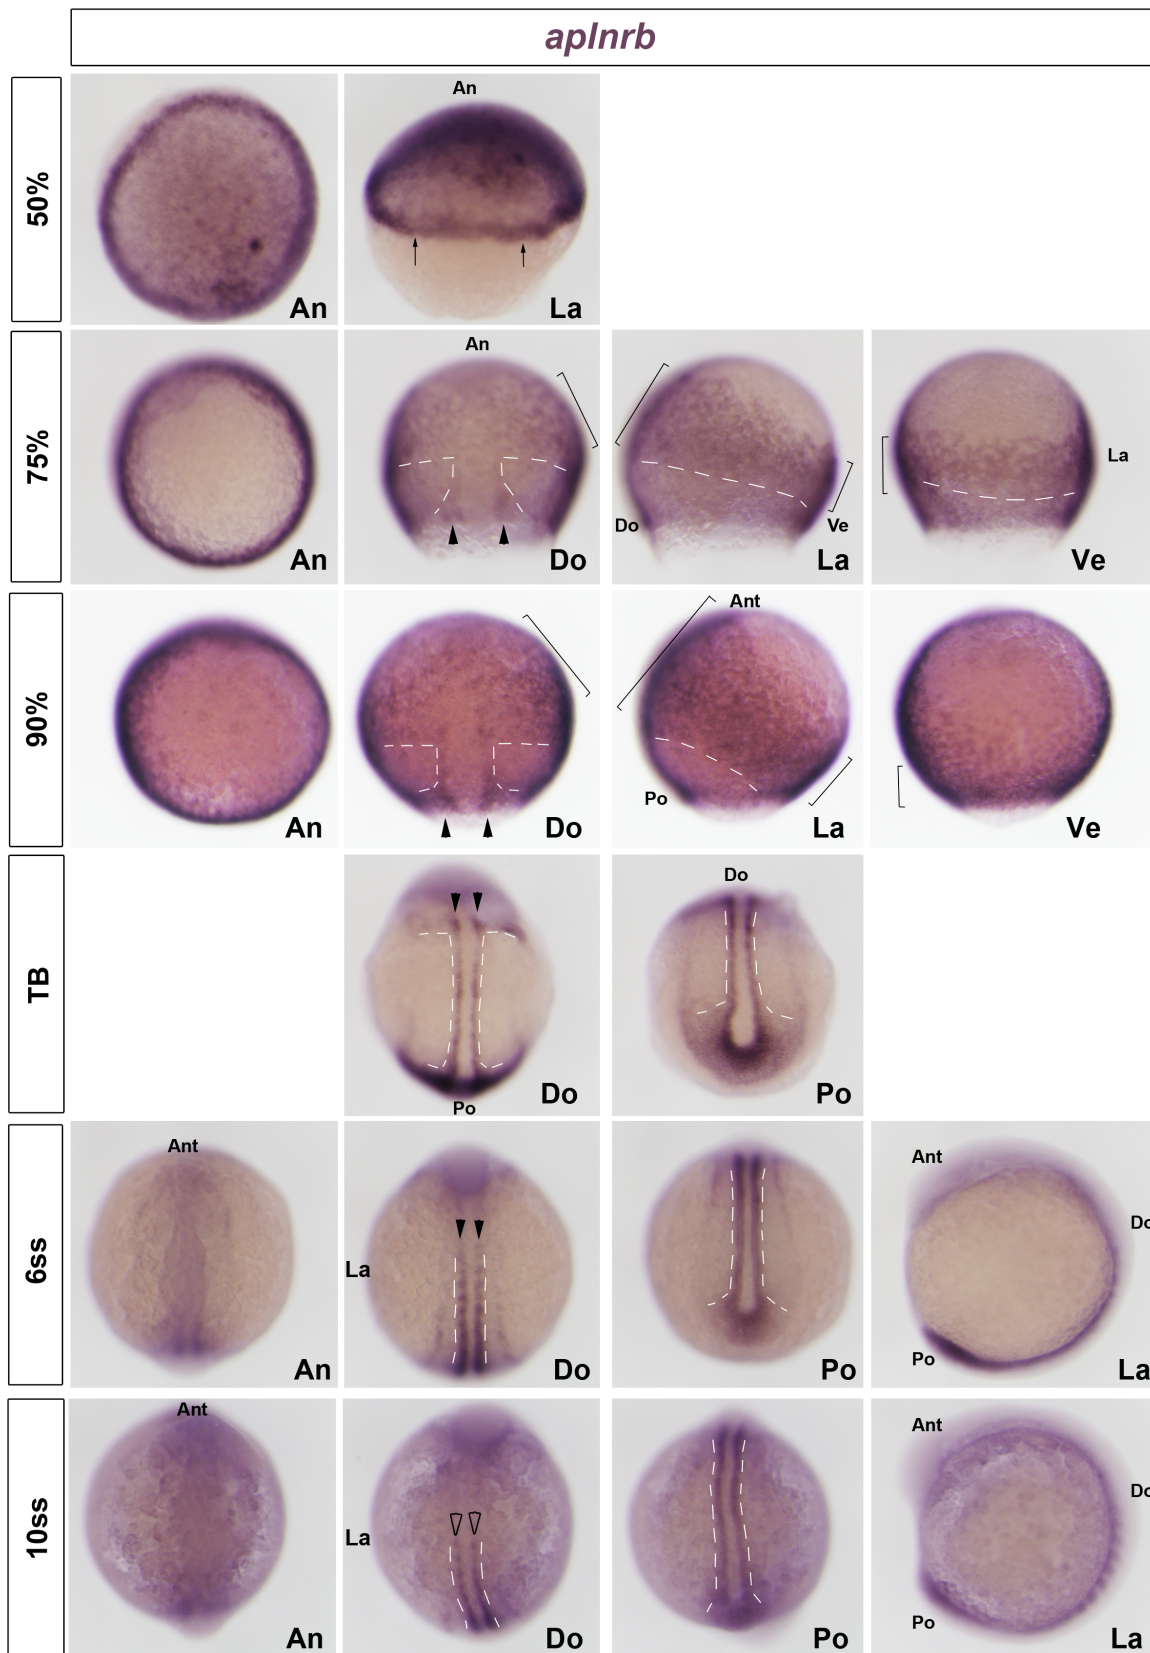

**Fig. S1. Expression of *aplnrb* mRNA during zebrafish axis formation.**

Wholemount in situ mRNA hybridization of apelin receptor b (*aplnrb*) mRNA in zebrafish embryos at the indicated stages, shown in animal (An), lateral (La), dorsal (Do, animal to top), ventral (Ve, animal to top) and posterior (Po, dorsal to top) views. Ant = anterior. Note significant expression in early germ ring (arrows), future cranial mesoderm (large and small brackets highlight comparable regions of expression) and adaxial cells (arrowheads). Expression is lacking in paraxial mesoderm (white dashes) that expresses *myf5* and later *myod* mRNAs (see Fig. 1C). Between 75-90% epiboly, *aplnrb* mRNA has a complex and informative expression pattern, marking the anterior invaginating mesoderm cells around the germ ring and the pre-axial cells, but appears down-regulated in more lateral regions expressing *myf5* but not *myod*.

Fig. S2

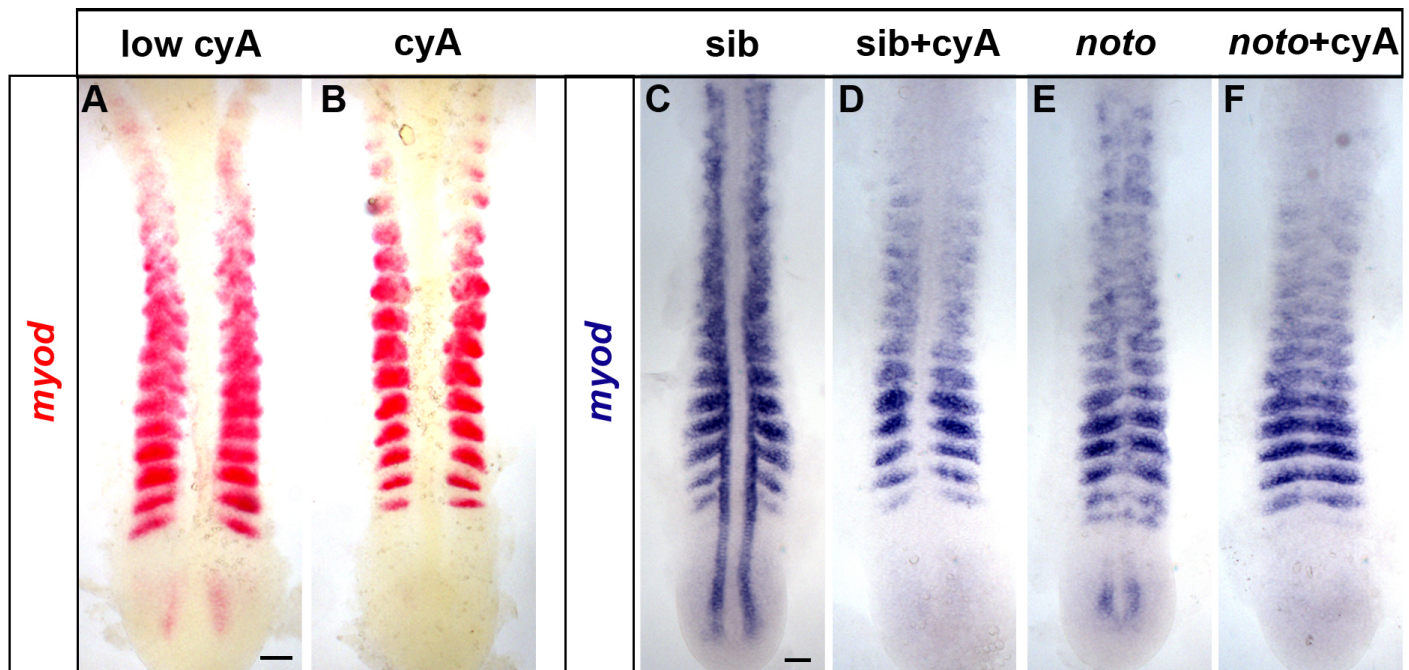

**Fig. S2. Hh signals are required for induction of adaxial *myod* in the tail.**

Dorsal flatmount preparations showing in situ mRNA hybridisation for *myod* at 15ss. **A,B.** Wild-type embryos were treated with either a low dose (50  $\mu$ M, A) or the standard dose of cyA (100  $\mu$ M, B). The control vehicle-treated embryo is shown in Fig. 1B. **C-F.** Hh signalling is required to drive pre-adaxial *myod* induction in the tail of *noto* mutants. Embryos from a *noto*<sup>m614/+</sup> incross were treated with cyA (D,F) or vehicle control (C,E). Bars: 50  $\mu$ m.

Fig. S3

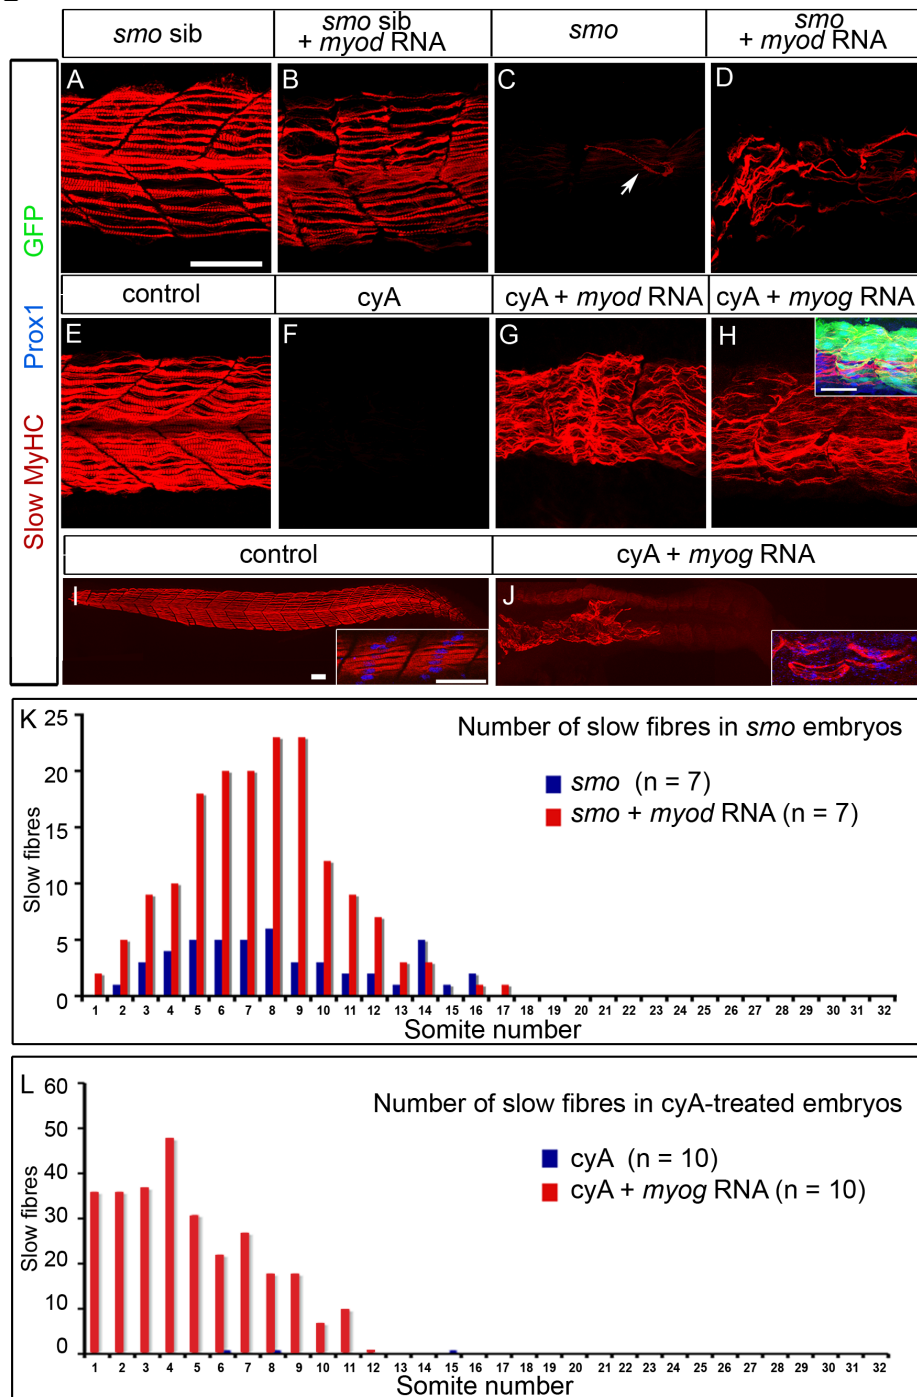**Fig. S3. MRF over-expression rescues trunk slow myogenesis.**

Confocal stacks showing immunodetection of slow fibres with Slow MyHC in *smo* mutant (identified by lack of tail circulation), *smo* sibling, un-injected control or *cyA*-treated embryos injected with *myod* or *myog* RNA. All embryos orientated anterior to left dorsal up showing 2-3 trunk somites (A-H) or entire trunk and tail (I,J). **A,B.** *Myod* RNA-injected *smo* siblings have slow muscle with disrupted somite morphology. **C,D.** Rare slow fibres present in the trunk region of *smo* mutants (arrow) are more common after *myod* RNA injection. **E,F.** *CyA*-treatment prevents slow fibre formation. Presence of maternal *Smo* protein may account for the greater number of residual slow fibres in *smo* mutant compared to *cyA*-treated embryos. **G,H.** *Myod* or *myog* RNA injection rescues slow fibre formation in *cyA*-treated embryos. Inset in H shows co-expression of slow MyHC, Prox1 and GFP in a *cyA*-treated embryo after injection of *myog-ires-gfp* RNA. **I,J.** *Myog* RNA rescues slow fibres in trunk but not tail. Insets show co-expression of Prox1 and slow MyHC in short confocal stacks. **K.** Slow fibres were counted at 24 hpf in each somite of seven control *smo* mutants and seven *smo* mutants injected at 1 cell stage with *myod* RNA. **L.** Slow fibres were counted at 24 hpf in each somite of ten control uninjected and ten embryos injected at 1 cell stage with *myog* RNA that were each subsequently treated with *cyA* from 30% epiboly. Lack of slow fibre induction in tail could reflect either differential tissue sensitivity or dilution of the injected mRNA. Bars: 50  $\mu$ m.

## Fig. S4

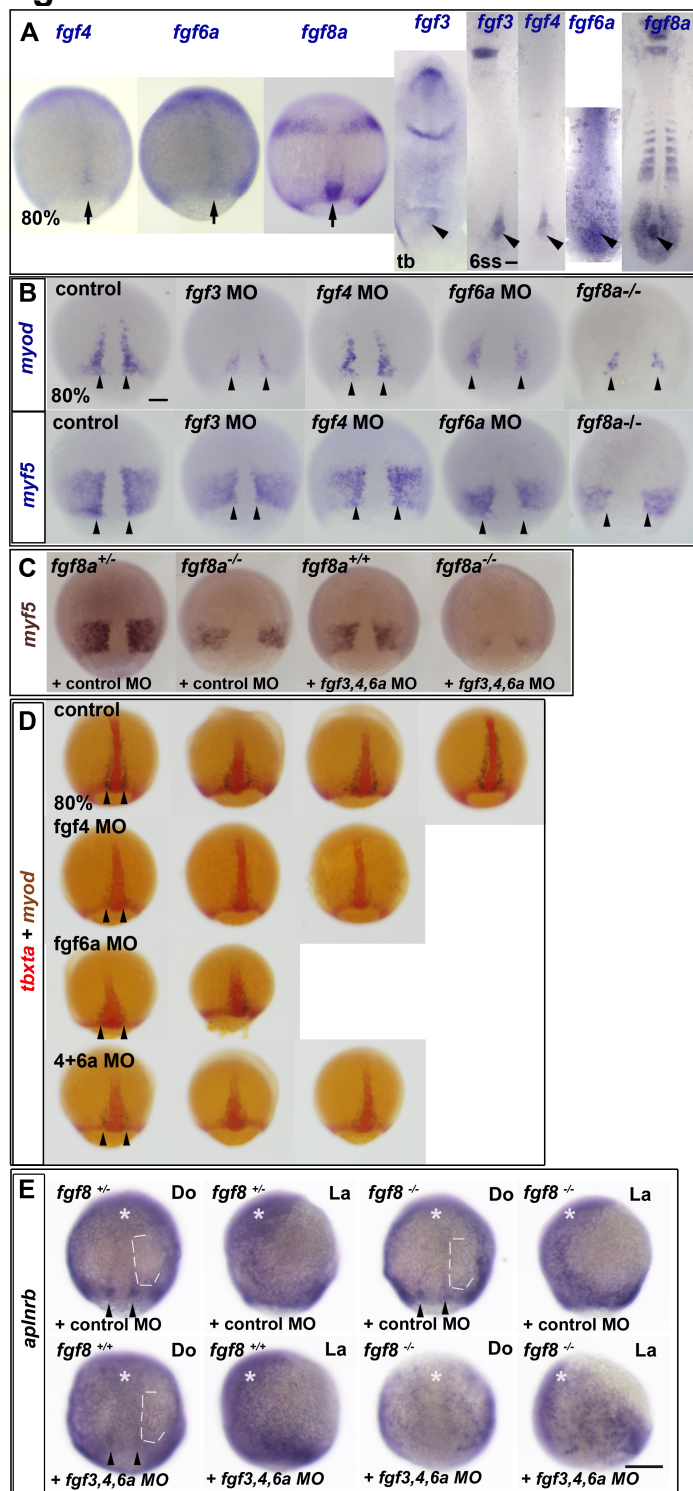

**Fig. S4. Dorsal *fgf* expression and requirement for adaxial myogenesis.**

In situ mRNA hybridization for *fgfs* in wild type embryos at 80% epiboly, tailbud (tb) and 6ss (A), for *myod* and *myf5* in control and *fgf* MO-injected and *fgf8a*<sup>-/-</sup> embryos at 80% (B,C) and for *tbxta* (red) and *myod* (blue/brown) (D). **A.** *fgf8a*, *fgf4*, *fgf6a* and *fgf3* transcripts appear successively in wild type embryos in the dorsal midline (arrows) and CNH (arrowheads). **B.** *Myod* and *myf5* mRNAs in *fgf3* MO, *fgf4* MO and *fgf6a* MO wild type embryos and in sequence-genotyped *fgf8a*<sup>-/-</sup> embryos at 80% epiboly (upper rows, control and single MOs from a representative experiment). Note that siblings of the *fgf8a* mutants had similar MRF expression. Arrowheads indicate nascent adaxial cells. **C.** *Myf5* mRNA in sibling embryos from an incross of heterozygous *fgf8a*<sup>+/-</sup> fish injected with 6 ng control MO or 2 ng each of *fgf3*, *fgf4* and *fgf6a* MO. Note the successively stronger reduction in signal as more *fgf* function is removed. **D.** Rows showing replicate *fgf* MO-injected embryos had reduced accumulation of *myod* mRNA in pre-adaxial cells of compared to control (arrowheads). Note widening of notochord in *fgf6a* morphants. **E.** *Aplnrnb* mRNA in *fgf* MO- or control MO-injected embryos from an incross of heterozygous *fgf8a*<sup>+/-</sup> fish showing good gastrulation (asterisks), but reduction in *aplnrnb* mRNA in pre-adaxial cells (arrowheads) and increase in paraxial region (white dashes) in dorsal (Do) and lateral (La; dorsal to right) view when *fgf* signalling was reduced (lower right). Bars: 100  $\mu$ m.

**Fig. S5**

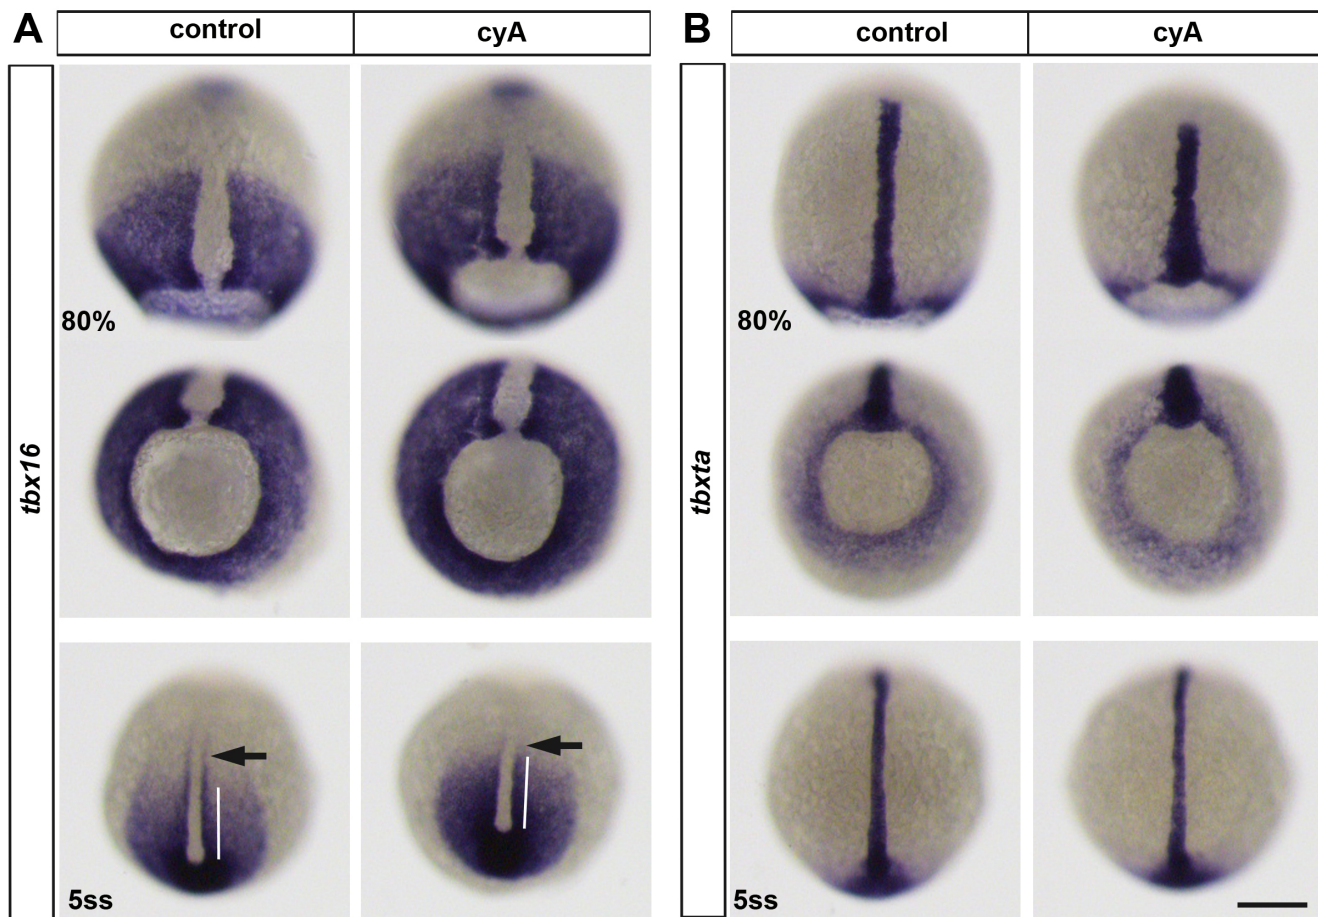

**Fig. S5. Tbx mRNA changes in response to Hedgehog signalling blockade.**

In situ mRNA hybridization for *tbx16* (A) and *tbxta* (B) in cyA- and control vehicle-treated wild type embryos at 80% epiboly and 5 ss developmental stages. Single embryos are shown from dorsal (80% and 5ss) and vegetal (80%) views. Adaxial *tbx16* mRNA is unaffected by cyA treatment as cells leave the germ ring/tailbud (white line), but is diminished in anterior PSM (arrowheads). Bar: 200  $\mu$ m.

Fig. S6

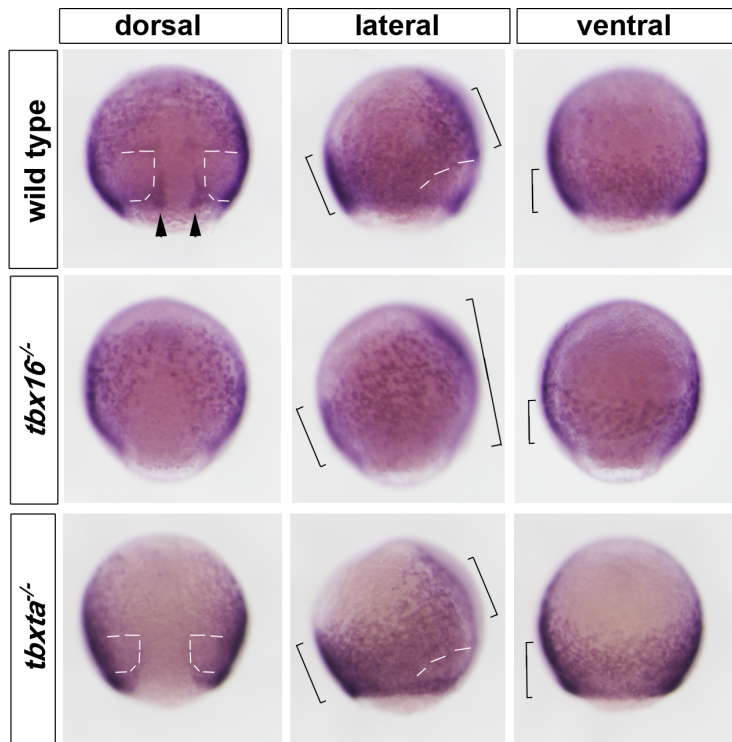

**Fig. S6. *ApInrb* mRNA changes in *Tbx* mutants.**

In situ mRNA hybridization for *apInrb* in wild type sibling and *tbx16* mutant and *tbxta* mutant embryos at 80% epiboly. Single embryos are shown from dorsal, left lateral and ventral views. Labelling (brackets) is in a band of anterior mesoderm. Note the unlabelled region in wild type and *tbxta* mutant that is missing in *tbx16* mutant (white dashes). Adaxial *apInrb* mRNA up-regulation (arrowheads) is lacking in mutants.

Fig. S7

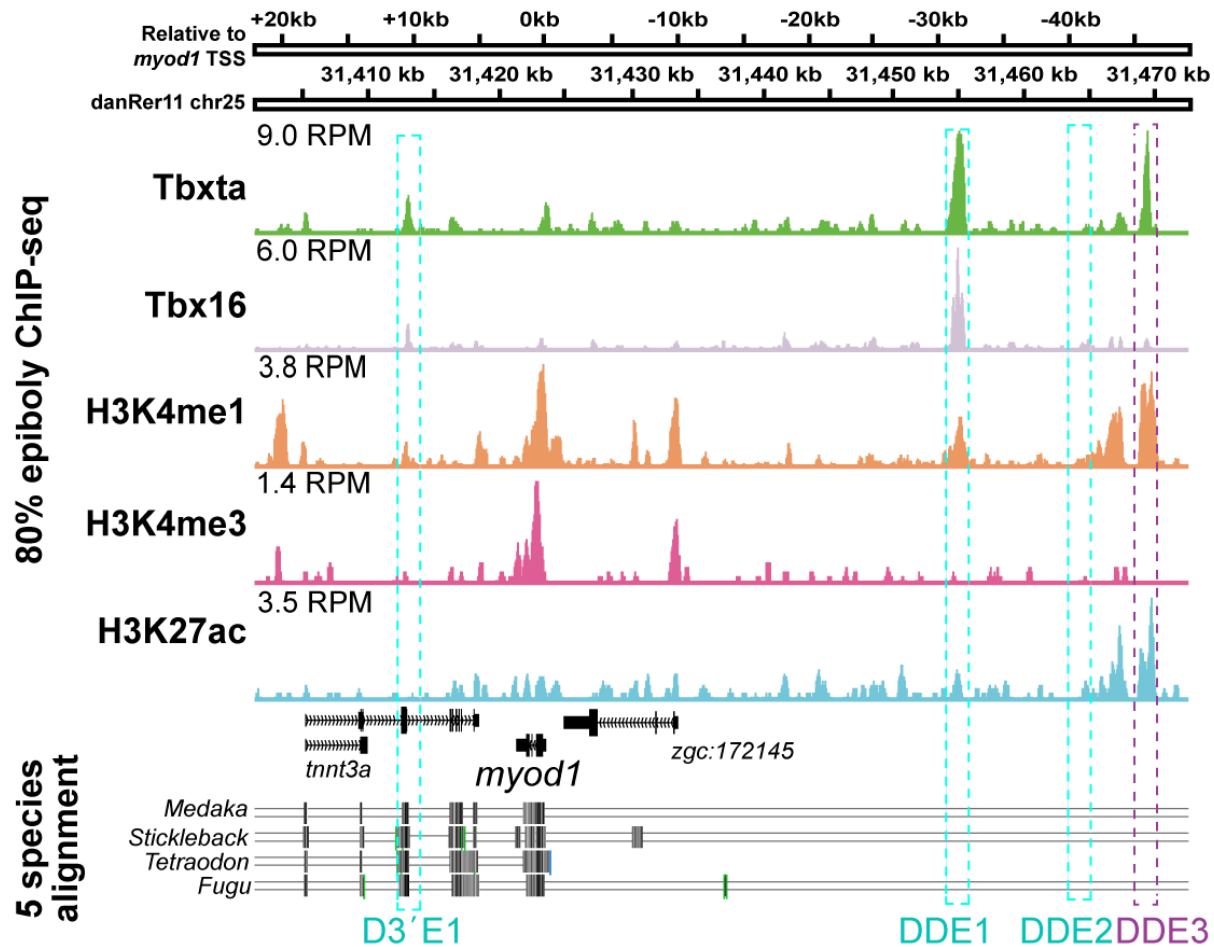

**Fig. S7. ChIP-seq analysis of *myod* locus.**

ChIP-seq on wt embryos at 75-85% epiboly indicates endogenous Tbx16 and Tbxta binding events within 75 kb flanking *myod* TSS. H3K4me3 marks TSSs; H3K4me1 marks enhancers; H3K27ac indicates active enhancers; RPM – ChIP-seq peaks height in reads per million reads. Multiz Alignments & Conservation from UCSC Genome Browser (Haeussler et al., 2019) are shown beneath. Purple boxes indicate significant Tbx binding for Tbx16 and Tbxta (DDE1) and Tbxta alone (DDE3). Cyan boxes indicate of Tbx sites mentioned in text. Significant H3K4me1 marks are present at both DDE1 and DDE3, while only DDE3 has a significant H3K27ac mark.

## Fig. S8

### A. Approximate regional division of myogenesis

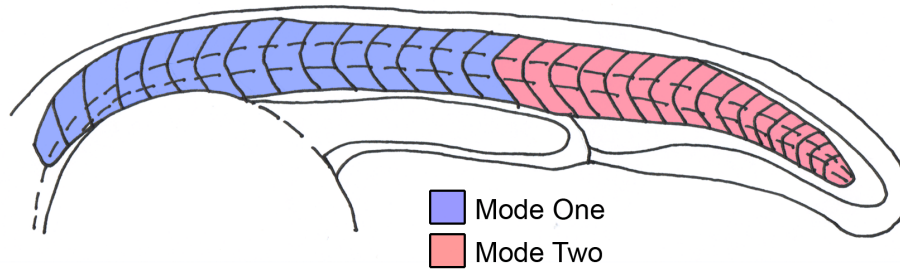

### B. Mode One: Trunk slow myogenesis

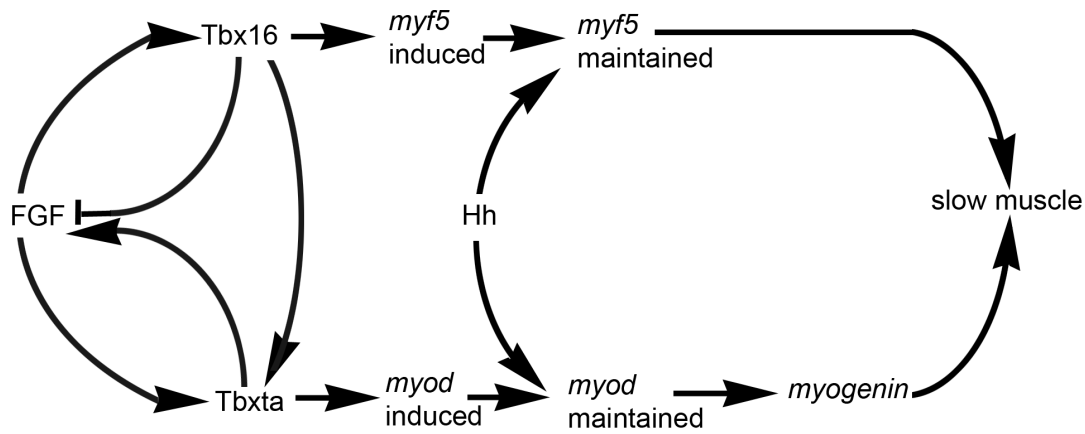

### C. Mode Two: Tail slow myogenesis

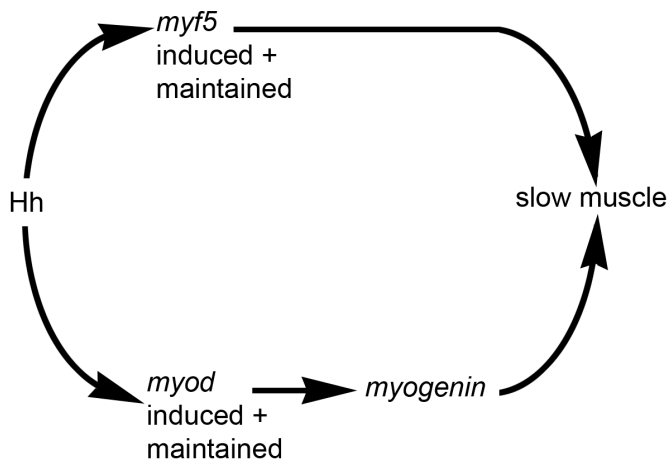

**Fig. S8. Model illustrating the diminishing role of Fgf signalling in slow myogenesis from trunk to tail.** Note that not all interactions in precursors of adaxial slow muscle cells are shown. In particular, our data indicate that Fgf has effects on both the accumulation of Tbx mRNAs and subsequently on the activity of Tbx proteins. Note also that Fgf-dependent Tbx16 regulation of *myf5* mRNA accumulation in paraxial precursors of fast muscle and dermomyotome is not illustrated.



Table S1 Quantitation of data in Figures

| Figure panel | + | Assay              | Treatment/genotype                                                                                                                     | Embryos with phenotype shown/Total (%)                                                |
|--------------|---|--------------------|----------------------------------------------------------------------------------------------------------------------------------------|---------------------------------------------------------------------------------------|
| 1A           |   | <i>myod</i> mRNA   | control<br>SU5402<br>control<br>cyA                                                                                                    | 51/51 (100%)<br>40/40 (100%)<br>80/80 (100%)<br>60/60 (100%)                          |
| 1A           |   | <i>myf5</i> mRNA   | control<br>SU5402<br>control<br>cyA                                                                                                    | 50/50 (100%)<br>36/36 (100%)<br>81/81 (100%)<br>68/68 (100%)                          |
| 1A           |   | <i>aplnrb</i> mRNA | control<br>SU5402                                                                                                                      | 30/30 (100%)<br>28/28 (100%)                                                          |
| 1B           |   | <i>myod</i> mRNA   | cyA 6ss<br><i>smo</i> 6ss<br><i>smo</i> + cyA 6ss<br><i>smo</i> 15ss                                                                   | 83/83 (100%)<br>13/46 (28%)<br>14/54 (26%)<br>26/99 (26%)                             |
| 1B           |   | <i>ptc1</i> mRNA   | <i>smo</i> 6ss<br>cyA                                                                                                                  | 11/67 (16%)<br>31/31 (100%)                                                           |
| 2A           |   | Slow MyHC          | <i>shha</i> 24hpf                                                                                                                      | 23/80 (29%)                                                                           |
| 2B           |   | Slow MyHC          | <i>noto</i> 24hpf                                                                                                                      | 25/88 (28%)                                                                           |
| 2C           |   | <i>myod</i> mRNA   | sib<br><i>noto</i><br>sib + cyA<br><i>noto</i> + cyA                                                                                   | 47/62 (76%)<br>15/62 (24%)<br>39/56 (70%)<br>17/56 (30%)                              |
| 2D           |   | <i>myod</i> mRNA   | control<br>cyA<br>SU5402<br>SU5402 + cyA                                                                                               | 67/67 (100%)<br>47/47 (100%)<br>116/116 (100%)<br>62/63 (98%)                         |
| 2D           |   | <i>myf5</i> mRNA   | control<br>cyA<br>SU5402<br>SU5402+cyA                                                                                                 | 20/20 (100%)<br>15/15 (100%)<br>5/5 (100%)<br>13/13 (100%)                            |
| 3A           |   | <i>myod</i> mRNA   | control<br><i>fgf6a</i> MO + <i>fgf8a</i> MO<br><i>fgf4</i> MO + <i>fgf8a</i> MO<br><i>fgf4</i> MO + <i>fgf6a</i> MO + <i>fgf8a</i> MO | 35/40 (88%) + 8/19 (42%)<br>38/46 (83%) + 22/26 (85%)<br>25/36 (69%)<br>13/15 (87%)   |
| 3A           |   | <i>myf5</i> mRNA   | control<br><i>fgf6a</i> MO + <i>fgf8a</i> MO<br><i>fgf4</i> MO + <i>fgf8a</i> MO<br><i>fgf4</i> MO + <i>fgf6a</i> MO + <i>fgf8a</i> MO | 38/40 (95%) + 20/20 (100%)<br>46/50 (97%) + 32/33 (91%)<br>11/38 (29%)<br>17/25 (68%) |
| 3B           |   | <i>myod</i> mRNA   | control<br>cyA<br><i>fgf4</i> MO + <i>fgf8a</i> MO<br><i>fgf4</i> MO + <i>fgf8a</i> MO + cyA                                           | 3/3 (100%)<br>5/5 (100%)<br>5/5 (100%)<br>4/5 (80%)                                   |
| 3C           |   | <i>myod</i> mRNA   | control ( <i>fgf4</i> )<br>+ <i>fgf4</i> mRNA<br>control ( <i>fgf6a</i> )<br>+ <i>fgf6a</i> mRNA                                       | 129/129 (100%)<br>131/136 (96%)<br>20/20 (100%)<br>20/20 (100%)                       |
| 3C           |   | <i>myf5</i> mRNA   | control ( <i>fgf4</i> )<br>+ <i>fgf4</i> mRNA<br>control ( <i>fgf6a</i> )<br>+ <i>fgf6a</i> mRNA                                       | 30/30 (100%)<br>34/40 (85%)<br>20/20 (100%)<br>18/18 (100%)                           |
| 3D           |   | <i>aplnrb</i> mRNA | control<br>+ <i>fgf4</i> mRNA                                                                                                          | 32/32 (100%)<br>12/18 (67%)                                                           |

| Figure panel | + | Assay             | Treatment/genotype                                                                                             | Embryos with phenotype shown/Total (%)                                                      |
|--------------|---|-------------------|----------------------------------------------------------------------------------------------------------------|---------------------------------------------------------------------------------------------|
| 4A           |   | <i>tbxta</i> mRNA | control 80%<br>low SU5402 80%<br>control 6ss<br>low SU5402 6ss<br>high SU5402 6ss                              | 21/21 (100%)<br>14/14 (100%)<br>52/52 (100%)<br>44/50 (88%)<br>32/32 (100%)                 |
| 4A           |   | <i>tbx16</i> mRNA | control 80%<br>low SU5402 80%<br>control 6ss<br>low SU5402 6ss<br>high SU5402 6ss                              | 21/21 (100%)<br>15/15 (100%)<br>40/40 (100%)<br>41/41 (100%)<br>74/74 (100%)                |
| 4B           |   | <i>myod</i> mRNA  | control<br><i>tbxta</i> MO<br><i>tbx16</i> MO                                                                  | 28/28 (100%)<br>20/21 (95%)<br>20/22 (91%)                                                  |
| 4B           |   | <i>myf5</i> mRNA  | control<br><i>tbxta</i> MO<br><i>tbx16</i> MO                                                                  | 30/30 (100%)<br>12/19 (63%)<br>19/20 (95%)                                                  |
| 4B           |   | <i>fgf8a</i> mRNA | control<br><i>tbxta</i> MO<br><i>tbx16</i> MO                                                                  | 30/30 (100%)<br>19/20 (95%)<br>18/20 (90%)                                                  |
| 4B           |   | <i>fgf3</i> mRNA  | control<br><i>tbxta</i> MO<br><i>tbx16</i> MO                                                                  | 25/25 (100%)<br>17/17 (100%)<br>11/14 (79%)                                                 |
| 4B           |   | <i>fgf4</i> mRNA  | control<br><i>tbxta</i> MO<br><i>tbx16</i> MO                                                                  | 28/28 (100%)<br>19/19 (100%)<br>12/14 (86%)                                                 |
| 4B           |   | <i>fgf8a</i> mRNA | control<br><i>tbxta</i> MO<br><i>tbx16</i> MO                                                                  | 30/30 (100%)<br>14/16 (88%)<br>10/12 (83%)                                                  |
| 4C           |   | <i>myod</i> mRNA  | control<br><i>tbxta</i> MO<br><i>tbx16</i> MO<br>cyA<br>cyA + <i>tbxta</i> MO<br>cyA + <i>tbx16</i> MO         | 31/31 (100%)<br>21/22 (95%)<br>24/24 (100%)<br>30/30 (100%)<br>23/23 (100%)<br>22/22 (100%) |
| 4C           |   | <i>myf5</i> mRNA  | control<br><i>tbxta</i> MO<br><i>tbx16</i> MO<br>cyA<br>cyA + <i>tbxta</i> MO<br>cyA + <i>tbx16</i> MO         | 40/40 (100%)<br>24/26 (92%)<br>25/25 (100%)<br>38/38 (100%)<br>19/20 (95%)<br>24/24 (100%)  |
| 5A           |   | <i>myod</i> mRNA  | sib<br><i>tbx16</i> <sup>-/-</sup><br>sib + <i>fgf4</i> mRNA<br><i>tbx16</i> <sup>-/-</sup> + <i>fgf4</i> mRNA | 82/122 (67%)<br>40/122 (33%)<br>95/128 (78%)<br>33/128 (26%)                                |
| 5A           |   | <i>myf5</i> mRNA  | sib<br><i>tbx16</i> <sup>-/-</sup><br>sib + <i>fgf4</i> mRNA<br><i>tbx16</i> <sup>-/-</sup> + <i>fgf4</i> mRNA | 95/120 (79%)<br>25/120 (21%)<br>98/126 (78%)<br>28/126 (22%)                                |
| 5B           |   | <i>tbxta</i> mRNA | control<br><i>fgf4</i> mRNA                                                                                    | 30/30 (100%)<br>20/21 (95%)                                                                 |
| 5B           |   | <i>tbx16</i> mRNA | control<br><i>fgf4</i> mRNA                                                                                    | 29/29 (100%)<br>61/61 (100%)                                                                |

| Figure panel | + | Assay              | Treatment/genotype                                                                                                                                               | Embryos with phenotype shown/Total (%)                                                   |
|--------------|---|--------------------|------------------------------------------------------------------------------------------------------------------------------------------------------------------|------------------------------------------------------------------------------------------|
| 5C           |   | <i>myod</i> mRNA   | control<br>+tbx16 mRNA<br>control + 10 $\mu$ M SU5402<br>+tbx16 mRNA + 10 $\mu$ M SU5402                                                                         | 31/31 (100%)<br>7/42 (17%)<br>32/32 (100%)<br>7/35 (20%)                                 |
| 5C           |   | <i>myf5</i> mRNA   | control<br>+tbx16 mRNA<br>control + 10 $\mu$ M SU5402<br>+tbx16 mRNA + 10 $\mu$ M SU5402                                                                         | 24/24 (100%)<br>14/42 (33%)<br>29/29 (100%)<br>4/35 (11%)                                |
| 5D           |   | <i>myf5</i> mRNA   | control<br>+tbx16 mRNA<br>control + 60 $\mu$ M SU5402<br>+tbx16 mRNA + 60 $\mu$ M SU5402                                                                         | 18/18 (100%)<br>2/23 (9%), 21/23 (91%) faint<br>8/8 (100%)<br>23/23 (100%)               |
| 5D           |   | <i>myod</i> mRNA   | control<br>+tbx16 mRNA<br>control + 60 $\mu$ M SU5402<br>+tbx16 mRNA + 60 $\mu$ M SU5402                                                                         | 15/15/ (100%)<br>2/24 (8%), 7/24 (29%) disrupted<br>15/15 (100%)<br>32/32 (100%)         |
| 6E           |   | <i>myf5</i> mRNA   | CHD alone<br>CHD + DEX                                                                                                                                           | 75/75 (100%)<br>35/70 (50%)                                                              |
| 6E           |   | <i>myod</i> mRNA   | CHD alone<br>CHD + DEX                                                                                                                                           | 28/28 (100%)<br>11/21 (52%)                                                              |
| 6F           |   | <i>myod</i> mRNA   | Control <i>myf5</i> het incross<br><i>myf5</i> <sup>+/+</sup> + tbx16 mRNA<br><i>myf5</i> <sup>+/-</sup> + tbx16 mRNA<br><i>myf5</i> <sup>-/-</sup> + tbx16 mRNA | 33/33 (100%)<br>6/6 (100%)<br>11/17 (65%)<br>2/4 (50%)                                   |
| 7A           |   | <i>myod</i> mRNA   | sib<br><i>tbxta</i> <sup>-/-</sup><br>sib + <i>fgf4</i> mRNA<br><i>tbxta</i> <sup>-/-</sup> + <i>fgf4</i> mRNA                                                   | 100/132 (76%)<br>32/132 (24%)<br>16/27 (59%) (for genotyping see<br>8/27 (29%) Table S4) |
| 7A           |   | <i>myf5</i> mRNA   | sib<br><i>tbxta</i> <sup>-/-</sup><br>sib + <i>fgf4</i> mRNA<br><i>tbxta</i> <sup>-/-</sup> + <i>fgf4</i> mRNA                                                   | 108/138 (78%)<br>30/138 (22%)<br>50/74 (68%)<br>24/74 (32%)                              |
| 7B           |   | <i>aplnrb</i> mRNA | sib<br><i>tbxta</i> <sup>-/-</sup><br>sib + <i>fgf4</i> mRNA<br><i>tbxta</i> <sup>-/-</sup> + <i>fgf4</i> mRNA                                                   | 144/195 (74%)<br>51/195 (26%)<br>12/18 (67%)<br>6/18 (33%)                               |
| 7D           |   | <i>tbx16</i> mRNA  | sib<br><i>tbxta</i> <sup>-/-</sup><br>sib + <i>fgf4</i> mRNA<br><i>tbxta</i> <sup>-/-</sup> + <i>fgf4</i> mRNA                                                   | 48/66 (73%)<br>18/66 (27%)<br>70/93 (75%)<br>23/93 (25%)                                 |
| 8A           |   | Bright field       | sib<br><i>tbx16</i> <sup>-/-</sup><br>+ <i>fgf4</i> mRNA                                                                                                         | 28/41 (68%)<br>13/41 (32%)<br>48                                                         |
| 8B           |   | <i>myhz1</i> mRNA  | sib<br><i>tbx16</i> <sup>-/-</sup><br>sib + <i>fgf4</i> mRNA<br><i>tbx16</i> <sup>-/-</sup> + <i>fgf4</i> mRNA                                                   | 27/40 (68%)<br>13/40 (32%)<br>38/48 (79%)<br>10/48 (21%)                                 |

| Figure panel | + | Assay                               | Treatment/genotype                                                                                                                 | Embryos with phenotype shown/Total (%)                                                                                                |
|--------------|---|-------------------------------------|------------------------------------------------------------------------------------------------------------------------------------|---------------------------------------------------------------------------------------------------------------------------------------|
| 8C,D         |   | <i>tbx16</i> mRNA+<br>Tbx1a protein | sib<br><i>tbx16</i> <sup>-/-</sup><br>sib + <i>fgf4</i> mRNA<br><i>tbx16</i> <sup>-/-</sup> + <i>fgf4</i> mRNA                     | 33/47 (70%)<br>14/47 (30%)<br>40/57 (70%)<br>17/57 (30%)                                                                              |
| 8E           |   |                                     | sib<br><i>tbxt16</i> <sup>-/-</sup><br>sib + <i>fgf4</i> mRNA<br><i>tbx16</i> <sup>-/-</sup> + <i>fgf4</i> mRNA                    | 19/28 (68%)<br>9/28 (32%)<br>19/31 (61%)<br>12/31 (39%)                                                                               |
| S1           |   | <i>aplnrb</i> mRNA                  | 50%-10ss                                                                                                                           | approx. 25 embryos/stage                                                                                                              |
| S2A          |   | Slow MyHC                           | <i>smo</i> sib                                                                                                                     | 27/40 (67.5%)                                                                                                                         |
| S2B          |   | Slow MyHC                           | <i>smo</i> sib + <i>myod</i> mRNA                                                                                                  | 28/35 (80%)                                                                                                                           |
| S2C          |   | Slow MyHC                           | <i>smo</i> <sup>-/-</sup>                                                                                                          | 13/40 (32.5%)                                                                                                                         |
| S2D          |   | Slow MyHC                           | <i>smo</i> <sup>-/-</sup> + <i>myod</i> mRNA                                                                                       | 7/35 (20%)                                                                                                                            |
| S2E          |   | Slow MyHC                           | control                                                                                                                            | 100/100 (100%)                                                                                                                        |
| S2F          |   | Slow MyHC                           | cyA                                                                                                                                | 73/73 (100%)                                                                                                                          |
| S2G          |   | Slow MyHC                           | cyA + <i>myod</i> mRNA                                                                                                             | 20/32 (63%)                                                                                                                           |
| S2H          |   | Slow MyHC<br>+ Prox1 +<br>GFP       | cyA + <i>myog</i> mRNA                                                                                                             | 26/46 (57%)                                                                                                                           |
| S2I          |   | Slow MyHC +<br>Prox1                | 24hpf                                                                                                                              | 50/50 (100%)                                                                                                                          |
| S2J          |   | Slow MyHC +<br>Prox1                | 24hpf                                                                                                                              | 26/43 (60%)                                                                                                                           |
| S3B          |   | <i>myod</i> mRNA                    | control<br>+ <i>fgf3</i> MO<br>+ <i>fgf4</i> MO<br>+ <i>fgf6a</i> MO<br><i>fgf8a</i> <sup>-/-</sup>                                | 39/47<br>58/65<br>46/70<br>52/69                                                                                                      |
| S3B          |   | <i>myf5</i> mRNA                    | control<br>+ <i>fgf3</i> MO<br>+ <i>fgf4</i> MO<br>+ <i>fgf6a</i> MO<br><i>fgf8a</i> <sup>-/-</sup>                                | 51/51 (100%)<br>21/58 (36%)<br>19/58 (33%)<br>44/69 (64%)                                                                             |
| S3C          |   | <i>myf5</i> mRNA                    | sib + control MO<br><i>fgf8a</i> <sup>-/-</sup> + control MO<br>sib + triple Fgf MO<br><i>fgf8a</i> <sup>-/-</sup> + triple Fgf MO | 13/17 (76%) (2/2 genotyped sib)<br>4/17 (24%) (3/4 genotyped -/-)<br>19/31 (77%) (2/2 genotyped sib)<br>7/31(23%) (3/3 genotyped -/-) |
| S3D          |   | <i>myod</i> mRNA                    | control<br>+ <i>fgf4</i> MO<br>+ <i>fgf6a</i> MO<br>+ <i>fgf4</i> MO + <i>fgf6a</i> MO                                             | 4/4<br>3/3<br>2/2<br>3/3                                                                                                              |
| S3E          |   | <i>aplnrb</i> mRNA                  | + Control MO<br><i>fgf8a</i> <sup>+/+</sup> + triple Fgf MO<br><i>fgf8a</i> <sup>-/-</sup> + triple Fgf MO                         | 42/42 (genotyped: 1 +/+, 5 +/-, 2 -/-)<br>32/38 (genotyped: 1 +/+, 3 +/-)<br>6/38 (genotyped: 3/3 -/-)                                |
| S4A          |   | <i>tbx16</i> mRNA                   | control @ 80%<br>cyA @ 80%<br>control @ 5ss<br>cyA @ 5ss                                                                           | 16/16<br>19/19<br>33/33<br>18/18                                                                                                      |
| S4B          |   | <i>tbxta</i> mRNA                   | control @ 80%<br>cyA @ 80%<br>control @ 5ss<br>cyA @ 5ss                                                                           | 13/13<br>25/25<br>29/29<br>32/32                                                                                                      |

**Table S2 Sequences of morpholinos and primers**

| <b>Morpholino</b>                                 |                                                                               |                                             |                                                    |
|---------------------------------------------------|-------------------------------------------------------------------------------|---------------------------------------------|----------------------------------------------------|
| <b>Gene</b>                                       | <b>Sequence</b> (start codon underlined)                                      | <b>Quantity (ng)</b>                        | <b>Reference</b>                                   |
| <i>fgf3</i>                                       | 5'- <u>CAT</u> TGTGGCATGGCGGGATGTCGGC-3'                                      | 7.5                                         | (Maroon et al., 2002)                              |
| <i>fgf4</i>                                       | 5'-GCAAGAGGGCTGACTGGACACT <u>CAT</u> -3'                                      | 2-6                                         |                                                    |
| <i>fgf6a</i>                                      | 5'-TGAGGAACCTTTGCGCAGTGGCC <u>CAT</u> -3'                                     | 2-6                                         |                                                    |
| <i>fgf8a</i>                                      | 5'-GAGTCT <u>CAT</u> GTTTATAGCCTCAGTA -3'                                     | 2                                           | (Furthauer et al., 2001)                           |
| <i>tbx16</i>                                      | 5'-GCTTGAGGTCTCTGATAGCCTG <u>CAT</u> -3'                                      | 0.5                                         | (Bisgrove et al., 2005)                            |
| <i>tbxta</i>                                      | 5'-GACTTGAGGCAGGCATATTTCCGAT -3'<br>5'-GCTGGTCGGGACTTGAGGCAGAC <u>CAT</u> -3' | 0.25<br>2                                   | (Bisgrove et al., 2005; Feldman and Stemple, 2001) |
| control                                           | 5'-CCTCCTACCTCAGTTACAATTTATA -3'                                              | 3-6                                         | Gene Tools standard                                |
| <b>Primers</b> (start and stop codons underlined) |                                                                               |                                             |                                                    |
| <b>Gene</b>                                       | <b>Forward</b>                                                                | <b>Reverse</b>                              | <b>Reference</b>                                   |
| <i>fgf4</i>                                       | 5'-GAGCTCGAGCTCAT <u>GAG</u> TGTCCAGTCGGCCCTCTTG-3'                           | 5'-GTCGACGTCGACT <u>CAA</u> ATTCTAGGCAAG-3' |                                                    |
| 5DE_ChIP-qPCR                                     | 5'-TTCCTCACCGTACCTTTTGC-3'                                                    | 5'-CATTTCCTCCCAACAATACACC-3'                |                                                    |
| 5PE1_ChIP-qPCR                                    | 5'-GTGCAATTTTGGCTCAGCTT-3'                                                    | 5'-AGATCGGGGAAGTTCGCTAT-3'                  |                                                    |
| Negative region ( <i>rhod</i> )                   | 5'-GACTCCACACAATCTGCAACAT-3'                                                  | 5'-ACCACCTACGCTAAAGAAACCA-3'                | Morley et al., 2009                                |

**Table S3 Location and histone modifications of Tbx16 and Tbx16a ChIP-seq peaks on *myf5* and *myod* loci****Tbx16 ChIP-seq**

| <i>myf5</i> locus    |      |          |          | Zv9/danRer7         |                     | GRCz11/danRer11 |         |         |          |          |      |                                  |
|----------------------|------|----------|----------|---------------------|---------------------|-----------------|---------|---------|----------|----------|------|----------------------------------|
| Putative enhancer ID | chr  | start    | stop     | Tbx16 ChIP1 P value | Tbx16 ChIP2 P value | H3K4me1         | H3K4me3 | H3K27ac | start    | stop     | size | Distance from TSS to peak centre |
| 5DE                  | chr4 | 20596134 | 20597306 | 2.36592E-91         | 3.7325E-52          | Yes             | No      | Yes     | 21660444 | 21661616 | 1173 | -80198.5                         |
| 5PE1                 | chr4 | 20672749 | 20673195 | 5.47016E-11         | 6.93426E-08         | Yes             | No      | Yes     | 21737059 | 21737505 | 447  | -3945.5                          |
| 5PE3                 | chr4 | 20680778 | 20681312 | 1.69434E-08         | 1.96789E-06         | No              | No      | No      | 21745088 | 21745622 | 535  | +4126.5                          |

***myod* locus**

| Putative enhancer ID | chr   | start    | stop     | Tbx16 ChIP1 P value | Tbx16 ChIP2 P value | H3K4me1 | H3K4me3 | H3K27ac | start    | stop     | size | Distance from TSS to peak centre |
|----------------------|-------|----------|----------|---------------------|---------------------|---------|---------|---------|----------|----------|------|----------------------------------|
| D3'E1                | chr25 | 32256140 | 32256596 | 8.74984E-14         | 2.1727E-06          | No      | No      | No      | 31412869 | 31413325 | 457  | +10,396                          |
| DDE1                 | chr25 | 32297466 | 32298512 | 3.92645E-30         | 3.9355E-09          | Yes     | No      | No      | 31454195 | 31455241 | 1047 | -31224.5                         |
| DDE2                 | chr25 | 32307295 | 32307540 | 1.45546E-05         | 5.22396E-05         | No      | No      | No      | 31464024 | 31464269 | 246  | -40653                           |

**Tbx16a ChIP-seq**

| <i>myf5</i> locus    |      |          |          | Zv9/danRer7          |                      | GRCz11/danRer11 |         |         |          |          |      |                                  |
|----------------------|------|----------|----------|----------------------|----------------------|-----------------|---------|---------|----------|----------|------|----------------------------------|
| Putative enhancer ID | chr  | start    | stop     | Tbx16a ChIP1 P value | Tbx16a ChIP2 P value | H3K4me1         | H3K4me3 | H3K27ac | start    | stop     | size | Distance from TSS to peak centre |
| 5DE                  | chr4 | 20595996 | 20597295 | N.S.                 | 2.8774E-90           | Yes             | No      | Yes     | 21660306 | 21661605 | 1300 | -80273                           |
| 5PE2                 | chr4 | 20674923 | 20675240 | 4.46684E-06          | 1.1298E-13           | Yes             | No      | No      | 21739233 | 21739550 | 318  | -1837                            |

***myod* locus**

| Putative enhancer ID | chr   | start    | stop     | Tbx16a ChIP1 P value | Tbx16a ChIP2 P value | H3K4me1 | H3K4me3 | H3K27ac | start    | stop     | size | Distance from TSS to peak centre |
|----------------------|-------|----------|----------|----------------------|----------------------|---------|---------|---------|----------|----------|------|----------------------------------|
| DDE1                 | chr25 | 32297085 | 32298653 | N.S.                 | 2.26464E-12          | Yes     | No      | No      | 31453814 | 31455382 | 1569 | -31104.5                         |
| DDE3                 | chr25 | 32312015 | 32312366 | 1.08643E-07          | 1.14551E-37          | Yes     | No      | Yes     | 31468744 | 31469095 | 352  | -45426                           |

Peaks with significant H3K4me1 and H3K27ac

N.S. = not significant

**Table S4. Tbxta dosage controls response of *myod* to Fgf.**

| Fgf4 mRNA (pg) | Genotype | Number genotyped [%]¶ | <i>Myod</i> mRNA expression pattern in genotyped embryos (%) |              |                    |
|----------------|----------|-----------------------|--------------------------------------------------------------|--------------|--------------------|
|                |          |                       | Absent                                                       | Adaxial only | Expanded ventrally |
| 0              | -/-      | 4*                    | 4 (100%)§                                                    | 0 (0%)       | 0 (0%)             |
|                | +/-      | 3*                    | 0 (0%)                                                       | 3 (100%)     | 0 (0%)             |
|                | +/+      | 2*                    | 0 (0%)                                                       | 2 (100%)     | 0 (0%)             |
|                | Total    | 9                     | 8 ((15%))∞                                                   | 45 ((85%))   | 0 ((0%))           |
| 100            | -/-      | 8 [30%]               | 7 (88%)                                                      | 1 (12%)      | 0 (0%)             |
|                | +/-      | 14 [52%]              | 0 (0%)                                                       | 11 (79%)     | 3 (21%)            |
|                | +/+      | 5 [19%]               | 0 (0%)                                                       | 0 (0%)       | 5 (100%)           |
|                | Total    | 27                    | 7 (26%)                                                      | 12 (44%)     | 8 (30%)            |
| 0              | -/-      | 5*                    | 5 (100%)                                                     | 0 (0%)       | 0 (0%)             |
|                | +/-      | 2*                    | 0 (0%)                                                       | 2 (100%)     | 0 (0%)             |
|                | +/+      | 3*                    | 0 (0%)                                                       | 3 (100%)     | 0 (0%)             |
|                | Total    | 10                    | 9 ((30%))                                                    | 21 ((70%))   | 0 ((0%))           |
| 100            | -/-      | 1 [6%]                | 1 (100%)                                                     | 0 (0%)       | 0 (0%)             |
|                | +/-      | 8 [50%]               | 0 (0%)                                                       | 3 (37%)      | 5 (63%)            |
|                | +/+      | 7 [44%]               | 0 (0%)                                                       | 1 (14%)      | 6 (86%)            |
|                | Total    | 16                    | 1 (6%)                                                       | 4 (25%)      | 11 (69%)           |
| 150            | -/-      | 6 [25%]               | 5 (100%)                                                     | 1 (17%)      | 0 (0%)             |
|                | +/-      | 9 [38%]               | 0 (0%)                                                       | 6 (67%)      | 3 (33%)            |
|                | +/+      | 9 [38%]               | 0 (0%)                                                       | 2 (22%)      | 7 (78%)            |
|                | Total    | 24                    | 5 (21%)                                                      | 9 (38%)      | 10 (42%)           |
| 225            | -/-      | 15 [24%]              | 12 (80%)                                                     | 3 (20%)      | 0 (0%)             |
|                | +/-      | 26 [42%]              | 0 (0%)                                                       | 11 (42%)     | 15 (58%)           |
|                | +/+      | 21 [34%]              | 0 (0%)                                                       | 4 (19%)      | 17 (81%)           |
|                | Total    | 62                    | 12 (19%)                                                     | 18 (29%)     | 32 (52%)           |
| <b>Summary</b> |          |                       |                                                              |              |                    |
| 0              | -/-      | 9*                    | 9 (100%)                                                     | 0 (0%)       | 0 (0%)             |
|                | +/-      | 5*                    | 0 (0%)                                                       | 5 (100%)     | 0 (0%)             |
|                | +/+      | 5*                    | 0 (0%)                                                       | 5 (100%)     | 0 (0%)             |
|                | Total    | 19                    | 17 ((20%))                                                   | 66 ((80%))   | 0 ((0%))           |
| 100-225        | -/-      | 30 [23%]              | 25 (88%)                                                     | 5 (12%)      | 0 (0%)             |
|                | +/-      | 57 [44%]              | 0 (0%)                                                       | 31 (54%)     | 26 (46%)           |
|                | +/+      | 42 [33%]              | 0 (0%)                                                       | 7 (17%)      | 35 (83%)           |
|                | Total    | 129                   | 25 (19%)                                                     | 43 (33%)     | 61 (47%)           |

\* Only a subset of control embryos were genotyped (to ensure reproducibility).

§ Percentages in curved brackets represent fraction of embryos of indicated genotype showing listed *myod* expression pattern.

¶ Percentages in square brackets represent fraction of embryos in sample with each genotype.

∞ Percentages in double brackets represent fraction of embryos in sample showing listed *myod* expression pattern.

**Table S5 Summary of Results**

| Stage (hpf)                 | Genetic Background          | Treatment                                   | Gene product   | preadaxial cells | adaxial cells | paraxial mesoderm | somites | marginal zone | germ ring | notochord | Tailbud | slow muscle trunk | slow muscle tail | skeletal muscle | Dermomyotome/connective tissue | figure reference |          |
|-----------------------------|-----------------------------|---------------------------------------------|----------------|------------------|---------------|-------------------|---------|---------------|-----------|-----------|---------|-------------------|------------------|-----------------|--------------------------------|------------------|----------|
| 80-90% Epiboly              | wt                          | none                                        | <i>myf5</i>    | ✓                |               | ✓                 |         |               |           |           |         |                   |                  |                 |                                | Fig. 1A          |          |
|                             | wt                          | <i>cyA</i>                                  | <i>myf5</i>    | ✓                |               | ✓                 |         |               |           |           |         |                   |                  |                 |                                | Fig. 1A          |          |
|                             | wt                          | 60 uM SU5402                                | <i>myf5</i>    | x                |               | x                 |         |               |           |           |         |                   |                  |                 |                                | Fig. 1A          |          |
|                             | wt                          | <i>fgf3</i> MO                              | <i>myf5</i>    | ✓                |               | ✓                 |         |               |           |           |         |                   |                  |                 |                                | Fig. S3B         |          |
|                             | wt                          | <i>fgf4</i> MO                              | <i>myf5</i>    | ✓                |               | ✓                 |         |               |           |           |         |                   |                  |                 |                                | Fig. S3B         |          |
|                             | wt                          | <i>fgf6a</i> MO                             | <i>myf5</i>    | ✓                |               | ✓                 |         |               |           |           |         |                   |                  |                 |                                | Fig. S3B         |          |
|                             | <i>fgf8a</i> <sup>-/-</sup> | none                                        | <i>myf5</i>    | ✓                |               | ✓                 |         |               |           |           |         |                   |                  |                 |                                | Fig. S3B         |          |
|                             | wt                          | <i>fgf6a</i> , <i>fgf8a</i> MO              | <i>myf5</i>    | x                |               | ↓                 |         |               |           |           |         |                   |                  |                 |                                | Fig. 3A          |          |
|                             | wt                          | <i>fgf4</i> , <i>fgf8a</i> MO               | <i>myf5</i>    | x                |               | ↓↓                |         |               |           |           |         |                   |                  |                 |                                | Fig. 3A          |          |
|                             | wt                          | <i>fgf4</i> , <i>fgf6</i> , <i>fgf8a</i> MO | <i>myf5</i>    | x                |               | ↓↓                |         |               |           |           |         |                   |                  |                 |                                | Fig. 3A          |          |
|                             | <i>fgf8a</i> <sup>-/-</sup> | <i>fgf3</i> , <i>fgf4</i> , <i>fgf6a</i> MO | <i>myf5</i>    | x                |               | x                 |         |               |           |           |         |                   |                  |                 |                                | Fig. S3C         |          |
|                             | wt                          | <i>fgf4</i> mRNA                            | <i>myf5</i>    | ✓                |               | ✓                 |         | ✓             | ✓         |           |         |                   |                  |                 |                                | Fig. 3C          |          |
|                             | wt                          | <i>fgf6a</i> mRNA                           | <i>myf5</i>    | ✓                |               | ✓                 |         | ✓             | ✓         |           |         |                   |                  |                 |                                | Fig. 3C          |          |
|                             | wt                          | <i>tbxta</i> MO                             | <i>myf5</i>    | x                |               | ✓                 |         |               |           |           |         |                   |                  |                 |                                | Fig. 4B          |          |
|                             | wt                          | <i>tbx16</i> MO                             | <i>myf5</i>    | x                |               | ↓↓                |         |               |           |           |         |                   |                  |                 |                                | Fig. 4B          |          |
|                             | <i>tbx16</i> <sup>-/-</sup> | none                                        | <i>myf5</i>    | x                |               | x                 |         |               |           |           |         |                   |                  |                 |                                | Fig. 5A          |          |
|                             | <i>tbx16</i> <sup>-/-</sup> | <i>fgf4</i> mRNA                            | <i>myf5</i>    | x                |               | x                 |         |               |           |           |         |                   |                  |                 |                                | Fig. 5A          |          |
|                             | wt                          | <i>tbx16</i> mRNA                           | <i>myf5</i>    | ✓                |               | ✓                 |         | ✓             | ✓         |           |         |                   |                  |                 |                                | Fig. 5C          |          |
|                             | wt                          | 10uM SU5402                                 | <i>myf5</i>    | ↓↓               |               | ↓↓                |         |               |           |           |         |                   |                  |                 |                                | Fig. 5C          |          |
|                             | wt                          | 10uM SU5402, <i>tbx16</i> mRNA              | <i>myf5</i>    | ✓                |               | ✓                 |         |               |           |           |         |                   |                  |                 |                                | Fig. 5C          |          |
|                             | wt                          | 60uM SU5402, <i>tbx16</i> mRNA              | <i>myf5</i>    | x                |               | x                 |         |               |           |           |         |                   |                  |                 |                                | Fig. 5D          |          |
|                             | wt                          | <i>tbx16-GR</i> mRNA, CHD                   | <i>myf5</i>    | ✓                |               | ✓                 |         |               |           |           |         |                   |                  |                 |                                | Fig. 6E          |          |
|                             | wt                          | <i>tbx16-GR</i> mRNA, CHD, DEX              | <i>myf5</i>    | ✓                |               | ✓                 |         |               | ✓         |           |         |                   |                  |                 |                                | Fig. 6E          |          |
|                             | <i>tbxta</i> <sup>-/-</sup> | none                                        | <i>myf5</i>    | ✓                |               | ✓                 |         |               |           |           |         |                   |                  |                 |                                | Fig. 7A          |          |
|                             | <i>tbxta</i> <sup>-/-</sup> | <i>fgf4</i> mRNA                            | <i>myf5</i>    | ✓                |               | ✓                 |         | ✓             | ✓         |           |         |                   |                  |                 |                                | Fig. 7A          |          |
|                             |                             | wt                                          | none           | <i>myod</i>      | ✓             |                   |         |               |           |           |         |                   |                  |                 |                                |                  | Fig. 1A  |
|                             |                             | wt                                          | <i>cyA</i>     | <i>myod</i>      | ✓             |                   |         |               |           |           |         |                   |                  |                 |                                |                  | Fig. 1A  |
|                             |                             | wt                                          | 60uM SU5402    | <i>myod</i>      | x             |                   |         |               |           |           |         |                   |                  |                 |                                |                  | Fig. 1A  |
|                             |                             | wt                                          | <i>fgf3</i> MO | <i>myod</i>      | ✓             |                   |         |               |           |           |         |                   |                  |                 |                                |                  | Fig. S3B |
|                             |                             | wt                                          | <i>fgf4</i> MO | <i>myod</i>      | ✓             |                   |         |               |           |           |         |                   |                  |                 |                                |                  | Fig. S3B |
| wt                          |                             | <i>fgf6a</i> MO                             | <i>myod</i>    | ✓                |               |                   |         |               |           |           |         |                   |                  |                 |                                | Fig. S3B         |          |
| <i>fgf8a</i> <sup>-/-</sup> |                             | none                                        | <i>myod</i>    | ✓                |               |                   |         |               |           |           |         |                   |                  |                 |                                | Fig. S3B         |          |
| wt                          |                             | <i>fgf6a</i> , <i>fgf8a</i> MO              | <i>myod</i>    | ↓                |               |                   |         |               |           |           |         |                   |                  |                 |                                | Fig. 3A          |          |
| wt                          |                             | <i>fgf4</i> , <i>fgf8a</i> MO               | <i>myod</i>    | ↓↓               |               |                   |         |               |           |           |         |                   |                  |                 |                                | Fig. 3A          |          |
| wt                          |                             | <i>fgf4</i> , <i>fgf6</i> , <i>fgf8a</i> MO | <i>myod</i>    | x                |               |                   |         |               |           |           |         |                   |                  |                 |                                | Fig. 3A          |          |
| wt                          |                             | <i>fgf4</i> mRNA                            | <i>myod</i>    | ✓                |               | ✓                 |         |               | ✓         |           |         |                   |                  |                 |                                | Fig. 3C          |          |
| wt                          |                             | <i>fgf6a</i> mRNA                           | <i>myod</i>    | ✓                |               | ✓                 |         | ✓             | ✓         |           |         |                   |                  |                 |                                | Fig. 3C          |          |
| wt                          |                             | <i>tbxta</i> MO                             | <i>myod</i>    | x                |               |                   |         |               |           |           |         |                   |                  |                 |                                | Fig. 4B          |          |
| wt                          |                             | <i>tbx16</i> MO                             | <i>myod</i>    | x                |               |                   |         |               |           |           |         |                   |                  |                 |                                | Fig. 4B          |          |
| <i>tbx16</i> <sup>-/-</sup> |                             | none                                        | <i>myod</i>    | x                |               |                   |         |               |           |           |         |                   |                  |                 |                                | Fig. 5A          |          |
| <i>tbx16</i> <sup>-/-</sup> |                             | <i>fgf4</i> mRNA                            | <i>myod</i>    | x                |               |                   |         |               |           |           |         |                   |                  |                 |                                | Fig. 5A          |          |
| wt                          |                             | <i>tbx16</i> mRNA                           | <i>myod</i>    | ✓                |               | ✓                 |         |               | ✓         |           |         |                   |                  |                 |                                | Fig. 5C          |          |
| wt                          |                             | 10uM SU5402                                 | <i>myod</i>    | ↓↓               |               |                   |         |               |           |           |         |                   |                  |                 |                                | Fig. 5C          |          |
| wt                          |                             | 10uM SU5402, <i>tbx16</i> mRNA              | <i>myod</i>    | ✓                |               |                   |         |               |           |           |         |                   |                  |                 |                                | Fig. 5C          |          |
| wt                          |                             | 60uM SU5402, <i>tbx16</i> mRNA              | <i>myod</i>    | x                |               |                   |         |               |           |           |         |                   |                  |                 |                                | Fig. 5D          |          |
| wt                          |                             | <i>tbx16-GR</i> mRNA, CHD                   | <i>myod</i>    | ✓                |               |                   |         |               |           |           |         |                   |                  |                 |                                | Fig. 6E          |          |
| wt                          |                             | <i>tbx16-GR</i> mRNA, CHD, DEX              | <i>myod</i>    | ✓                |               | ✓                 |         |               | ✓         |           |         |                   |                  |                 |                                | Fig. 6E          |          |
| <i>myf5</i> <sup>+/-</sup>  |                             | none                                        | <i>myod</i>    | ✓                |               |                   |         |               |           |           |         |                   |                  |                 |                                | Fig. 6F          |          |
| <i>myf5</i> <sup>+/-</sup>  |                             | <i>tbx16</i> mRNA                           | <i>myod</i>    | ✓                |               | ✓                 |         |               | ✓         |           |         |                   |                  |                 |                                | Fig. 6F          |          |
| <i>myf5</i> <sup>-/-</sup>  |                             | <i>tbx16</i> mRNA                           | <i>myod</i>    | ✓                |               | ✓                 |         |               | ✓         |           |         |                   |                  |                 |                                | Fig. 6F          |          |
| <i>tbxta</i> <sup>-/-</sup> |                             | none                                        | <i>myod</i>    | x                |               |                   |         |               |           |           |         |                   |                  |                 |                                | Fig. 7A          |          |
| <i>tbxta</i> <sup>-/-</sup> |                             | <i>fgf4</i> mRNA                            | <i>myod</i>    | x                |               |                   |         |               |           |           |         |                   |                  |                 |                                | Fig. 7A          |          |
| wt                          |                             | none                                        | <i>aplnrb</i>  | ✓                |               | x                 |         |               | ✓         | ✓         |         |                   |                  |                 |                                | Fig. 1A          |          |



|           |                             |                              |               |    |   |   |    |    |   |   |  |  |  |   |  |          |
|-----------|-----------------------------|------------------------------|---------------|----|---|---|----|----|---|---|--|--|--|---|--|----------|
|           | wt                          | SU5402                       | <i>aplnrb</i> | x  |   | ↑ |    | ✓  | ✓ |   |  |  |  |   |  | Fig. 1A  |
|           | wt                          | <i>fgf4</i> mRNA             | <i>aplnrb</i> | ✓  |   | x |    | ↓  | ✓ |   |  |  |  |   |  | Fig. 3D  |
|           | <i>tbx16</i> <sup>-/-</sup> | none                         | <i>aplnrb</i> | x  |   | ↑ |    | ✓  | ✓ |   |  |  |  |   |  | Fig. S5  |
|           | <i>tbxta</i> <sup>-/-</sup> | none                         | <i>aplnrb</i> | x  |   | x |    | ✓  | ✓ |   |  |  |  |   |  | Fig. S5  |
|           | <i>tbxta</i> <sup>-/-</sup> | <i>fgf4</i> mRNA             | <i>aplnrb</i> | ✓  |   | ✓ |    | ↓  | ✓ |   |  |  |  |   |  | Fig. 7B  |
|           | <i>fgf8a</i> <sup>+/-</sup> | control MO                   | <i>aplnrb</i> | ✓  |   | x |    | ✓  | ✓ |   |  |  |  |   |  | Fig. S3E |
|           | <i>fgf8a</i> <sup>-/-</sup> | control MO                   | <i>aplnrb</i> | ✓  |   | x |    | ✓  | ✓ |   |  |  |  |   |  | Fig. S3E |
|           | <i>fgf8a</i> <sup>+/-</sup> | <i>fgf3,fgf4,fgf6a</i> MO    | <i>aplnrb</i> | ↓  |   | x |    | ✓  | ✓ |   |  |  |  |   |  | Fig. S3E |
|           | <i>fgf8a</i> <sup>-/-</sup> | <i>fgf3,fgf4,fgf6a</i> MO    | <i>aplnrb</i> | x  |   | x |    | ↓  | ↓ |   |  |  |  |   |  | Fig. S3E |
|           | wt                          | none                         | <i>tbxta</i>  |    |   |   |    |    | ✓ |   |  |  |  |   |  | Fig. 4A  |
|           | wt                          | 10um SU5402                  | <i>tbxta</i>  |    |   |   |    |    | ↓ |   |  |  |  |   |  | Fig. 4A  |
|           | wt                          | <i>fgf4</i> mRNA             | <i>tbxta</i>  |    |   |   |    |    | ↓ |   |  |  |  |   |  | Fig. 5B  |
|           | wt                          | <i>cyA</i>                   | <i>tbxta</i>  |    |   |   |    |    | ✓ |   |  |  |  |   |  | Fig. S4  |
|           | wt                          | none                         | <i>tbx16</i>  | ✓  |   |   |    | ✓  | ✓ |   |  |  |  |   |  | Fig. 4A  |
|           | wt                          | 10um SU5402                  | <i>tbx16</i>  | x  |   |   |    | ↓  | ↓ |   |  |  |  |   |  | Fig. 4A  |
|           | wt                          | <i>fgf4</i> mRNA             | <i>tbx16</i>  | ↓  |   |   |    | ✓  | ↓ |   |  |  |  |   |  | Fig. 5B  |
|           | wt                          | <i>cyA</i>                   | <i>tbx16</i>  | ✓  |   |   |    | ✓  | ✓ |   |  |  |  |   |  | Fig. S4  |
|           | <i>tbxta</i> <sup>-/-</sup> | none                         | <i>tbx16</i>  | ↓  |   |   |    | ✓  | ✓ |   |  |  |  |   |  | Fig. 7D  |
|           | <i>tbxta</i> <sup>-/-</sup> | <i>fgf4</i> mRNA             | <i>tbx16</i>  | x  |   |   |    | ↓  | ↓ |   |  |  |  |   |  | Fig. 7D  |
|           | <i>tbx16</i> <sup>-/-</sup> | none                         | <i>tbx16</i>  | ↓↓ |   |   |    | ↓↓ | ↓ |   |  |  |  |   |  | Fig. 8C  |
|           | <i>tbx16</i> <sup>-/-</sup> | <i>fgf4</i> mRNA             | <i>tbx16</i>  | x  |   |   |    | x  | x |   |  |  |  |   |  | Fig. 8C  |
|           | wt                          | none                         | <i>fgf8a</i>  |    |   |   |    |    | ✓ |   |  |  |  |   |  | Fig. 4B  |
|           | wt                          | <i>tbxta</i> MO              | <i>fgf8a</i>  |    |   |   |    |    | ✓ |   |  |  |  | x |  | Fig. 4B  |
|           | wt                          | <i>tbx16</i> MO              | <i>fgf8a</i>  |    |   |   |    |    | ↑ |   |  |  |  | x |  | Fig. 4B  |
|           | <i>tbx16</i> sib            | none                         | <i>Tbxt</i>   |    |   |   |    |    | ✓ |   |  |  |  | ✓ |  | Fig. 8D  |
|           | <i>tbx16</i> <sup>-/-</sup> | none                         | <i>Tbxt</i>   |    |   |   |    |    | ✓ |   |  |  |  | ↔ |  | Fig. 8D  |
|           | <i>tbx16</i> sib            | <i>fgf4</i> mRNA             | <i>Tbxt</i>   |    |   |   |    |    | ✓ |   |  |  |  | ↔ |  | Fig. 8D  |
|           | <i>tbx16</i> <sup>-/-</sup> | <i>fgf4</i> mRNA             | <i>Tbxt</i>   |    |   | ✓ |    |    | ✓ |   |  |  |  | ↔ |  | Fig. 8D  |
|           | <i>tbx16</i> sib            | none                         | <i>shha</i>   |    |   |   |    |    |   |   |  |  |  | ✓ |  | Fig. 8E  |
|           | <i>tbx16</i> <sup>-/-</sup> | none                         | <i>shha</i>   |    |   |   |    |    |   |   |  |  |  | ↔ |  | Fig. 8E  |
|           | <i>tbx16</i> sib            | <i>fgf4</i> mRNA             | <i>shha</i>   |    |   | ✓ |    |    |   |   |  |  |  | ↔ |  | Fig. 8E  |
|           | <i>tbx16</i> <sup>-/-</sup> | <i>fgf4</i> mRNA             | <i>shha</i>   | ✓  | ✓ | ✓ |    | ✓  | ✓ |   |  |  |  | ↔ |  | Fig. 8E  |
| Tailbud   | wt                          | none                         | <i>myod</i>   | ✓  | ✓ |   |    |    |   |   |  |  |  |   |  | Fig. 3B  |
|           | wt                          | <i>cyA</i>                   | <i>myod</i>   | ✓  | x |   |    |    |   |   |  |  |  |   |  | Fig. 3B  |
|           | wt                          | <i>fgf4, fgf8a</i> MO        | <i>myod</i>   | ✓  | ✓ |   |    |    |   |   |  |  |  |   |  | Fig. 3B  |
|           | wt                          | <i>cyA, fgf4, fgf8a</i> MO   | <i>myod</i>   | x  | x |   |    |    |   |   |  |  |  |   |  | Fig. 3B  |
| 6 somites | wt                          | none                         | <i>myod</i>   | ✓  | ✓ |   | ✓  |    |   |   |  |  |  |   |  | Fig. 1B  |
|           | wt                          | <i>cyA</i>                   | <i>myod</i>   | ✓  | x |   | ✓  |    |   |   |  |  |  |   |  | Fig. 1B  |
|           | <i>smo</i> <sup>-/-</sup>   | none                         | <i>myod</i>   | ✓  | x |   | ✓  |    |   |   |  |  |  |   |  | Fig. 1B  |
|           | <i>smo</i> <sup>-/-</sup>   | <i>cyA</i>                   | <i>myod</i>   | ✓  | x |   | ✓  |    |   |   |  |  |  |   |  | Fig. 1B  |
|           | <i>noto</i> <sup>-/-</sup>  | none                         | <i>myod</i>   | ✓  | ✓ |   | ✓  |    |   |   |  |  |  |   |  | Fig. 2C  |
|           | <i>noto</i> <sup>-/-</sup>  | <i>cyA</i>                   | <i>myod</i>   | ✓  | x |   | ✓  |    |   |   |  |  |  |   |  | Fig. 2C  |
|           | wt                          | <i>tbx16</i> MO*             | <i>myod</i>   | ↓  | ↓ |   | ↓↓ |    |   |   |  |  |  |   |  | Fig. 4C  |
|           | wt                          | <i>tbx16</i> MO*, <i>cyA</i> | <i>myod</i>   | x  | x |   | ↓↓ |    |   |   |  |  |  |   |  | Fig. 4C  |
|           | wt                          | <i>tbxta</i>                 | <i>myod</i>   | x  | ✓ |   | ✓  |    |   |   |  |  |  |   |  | Fig. 4C  |
|           | wt                          | <i>tbxta, cyA</i>            | <i>myod</i>   | x  | x |   | ✓  |    |   |   |  |  |  |   |  | Fig. 4C  |
|           | wt                          | none                         | <i>myf5</i>   | ✓  | ✓ | ✓ | ✓  |    |   |   |  |  |  | x |  | Fig. 4C  |
|           | wt                          | <i>tbx16</i> MO*             | <i>myf5</i>   | ↓  | ↓ | ✓ | ✓  |    |   |   |  |  |  | x |  | Fig. 4C  |
|           | wt                          | <i>tbx16</i> MO*, <i>cyA</i> | <i>myf5</i>   | x  | x | ✓ | ✓  |    |   |   |  |  |  | x |  | Fig. 4C  |
|           | wt                          | <i>tbxta</i>                 | <i>myf5</i>   | ↓  | ↓ | ✓ | ✓  |    |   |   |  |  |  | ✓ |  | Fig. 4C  |
|           | wt                          | <i>tbxta, cyA</i>            | <i>myf5</i>   | x  | x | ✓ | ✓  |    |   |   |  |  |  | ✓ |  | Fig. 4C  |
|           | wt                          | none                         | <i>tbxta</i>  |    |   |   |    |    |   | ✓ |  |  |  | ✓ |  | Fig. 4A  |
|           | wt                          | 10um SU5402                  | <i>tbxta</i>  |    |   |   |    |    |   | ✓ |  |  |  | ↓ |  | Fig. 4A  |
|           | wt                          | 30um SU5402                  | <i>tbxta</i>  |    |   |   |    |    |   | x |  |  |  | x |  | Fig. 4A  |
|           | wt                          | <i>cyA</i>                   | <i>tbxta</i>  |    |   |   |    |    |   | ✓ |  |  |  | ✓ |  | Fig. S4  |
|           | wt                          | none                         | <i>tbx16</i>  | ✓  |   | ✓ |    |    |   |   |  |  |  | ✓ |  | Fig. 4A  |
|           | wt                          | 10um SU5402                  | <i>tbx16</i>  | ✓  |   | ✓ |    |    |   |   |  |  |  | ↓ |  | Fig. 4A  |

|            |                             |                  |               |   |   |   |   |  |  |   |   |   |  |  |  |   |  |         |
|------------|-----------------------------|------------------|---------------|---|---|---|---|--|--|---|---|---|--|--|--|---|--|---------|
|            | wt                          | 30um SU5402      | <i>tbx16</i>  | x |   | x |   |  |  |   | x |   |  |  |  |   |  | Fig. 4A |
|            | wt                          | cyA              | <i>tbx16</i>  | ↓ |   | ✓ |   |  |  |   | ✓ |   |  |  |  |   |  | Fig. S4 |
|            | wt                          | none             | <i>fgf3</i>   |   |   |   |   |  |  | ✓ |   |   |  |  |  |   |  | Fig. 4B |
|            | wt                          | tbxtaMO          | <i>fgf3</i>   |   |   |   |   |  |  | x |   |   |  |  |  |   |  | Fig. 4B |
|            | wt                          | tbx16MO          | <i>fgf3</i>   |   |   |   |   |  |  | ↑ | ↑ |   |  |  |  |   |  | Fig. 4B |
|            | wt                          | none             | <i>fgf4</i>   |   |   |   |   |  |  | ✓ |   |   |  |  |  |   |  | Fig. 4B |
|            | wt                          | tbxtaMO          | <i>fgf4</i>   |   |   |   |   |  |  | x |   |   |  |  |  |   |  | Fig. 4B |
|            | wt                          | tbx16MO          | <i>fgf4</i>   |   |   |   |   |  |  | ↑ |   |   |  |  |  |   |  | Fig. 4B |
|            | wt                          | none             | <i>fgf8a</i>  |   |   | ✓ | ✓ |  |  | ✓ | ✓ |   |  |  |  |   |  | Fig. 4B |
|            | wt                          | tbxtaMO          | <i>fgf8a</i>  |   |   | ✓ | ✓ |  |  | ↓ | ✓ |   |  |  |  |   |  | Fig. 4B |
|            | wt                          | tbx16MO          | <i>fgf8a</i>  |   |   | ↑ | ✓ |  |  | ↑ | ↑ |   |  |  |  |   |  | Fig. 4B |
| 8 somites  | wt                          | none             | <i>myod</i>   | ✓ | ✓ |   | ✓ |  |  |   |   |   |  |  |  |   |  | Fig. 2D |
|            | wt                          | cyA              | <i>myod</i>   | ✓ | x |   | ✓ |  |  |   |   |   |  |  |  |   |  | Fig. 2D |
|            | wt                          | SU5402           | <i>myod</i>   | ✓ | ✓ |   | ↓ |  |  |   |   |   |  |  |  |   |  | Fig. 2D |
|            | wt                          | cyA, SU5402      | <i>myod</i>   | x | x |   | ↓ |  |  |   |   |   |  |  |  |   |  | Fig. 2D |
|            | wt                          | none             | <i>myf5</i>   | ✓ | ✓ | ✓ | ✓ |  |  |   |   |   |  |  |  |   |  | Fig. 2D |
|            | wt                          | cyA              | <i>myf5</i>   | ✓ | x | ✓ | ✓ |  |  |   |   |   |  |  |  |   |  | Fig. 2D |
|            | wt                          | SU5402           | <i>myf5</i>   | ✓ | ✓ | ✓ | ✓ |  |  |   |   |   |  |  |  |   |  | Fig. 2D |
|            | wt                          | cyA, SU5402      | <i>myf5</i>   | x | x | ↓ | ✓ |  |  |   |   |   |  |  |  |   |  | Fig. 2D |
| 15 somites | <i>smo</i> sib              | none             | <i>myod</i>   | ✓ | ✓ |   | ✓ |  |  |   |   |   |  |  |  |   |  | Fig. 1B |
|            | <i>smo</i> <sup>-/-</sup>   | none             | <i>myod</i>   | x | x |   | ✓ |  |  |   |   |   |  |  |  |   |  | Fig. 1B |
| 24 hpf     | <i>shha</i> sib             | none             | slow MyHC     |   |   |   |   |  |  | ✓ | ✓ |   |  |  |  |   |  | Fig. 2A |
|            | <i>shha</i> <sup>-/-</sup>  | none             | slow MyHC     |   |   |   |   |  |  | ✓ | x |   |  |  |  | ↓ |  | Fig. 2A |
|            | <i>noto</i> sib             | none             | slow MyHC     |   |   |   |   |  |  | ✓ | ✓ |   |  |  |  | ✓ |  | Fig. 2B |
|            | <i>noto</i> <sup>-/-</sup>  | none             | slow MyHC     |   |   |   |   |  |  | ✓ | x |   |  |  |  | ↓ |  | Fig. 2B |
|            | <i>smo</i> sib              | none             | slow MyHC     |   |   |   |   |  |  | ✓ | ✓ | ✓ |  |  |  | ✓ |  | Fig. S2 |
|            | <i>smo</i> sib              | <i>myod</i> RNA  | slow MyHC     |   |   |   |   |  |  | ↓ | ✓ |   |  |  |  | ↑ |  | Fig. S2 |
|            | <i>smo</i> <sup>-/-</sup>   | none             | slow MyHC     |   |   |   |   |  |  | ↓ | x |   |  |  |  | ↓ |  | Fig. S2 |
|            | <i>smo</i> <sup>-/-</sup>   | <i>myod</i> RNA  | slow MyHC     |   |   |   |   |  |  | ✓ | x |   |  |  |  | ↓ |  | Fig. S2 |
|            | wt                          | cyA              | slow MyHC     |   |   |   |   |  |  | x | x |   |  |  |  | ↓ |  | Fig. S2 |
|            | <i>smo</i> <sup>-/-</sup>   | cyA              | slow MyHC     |   |   |   |   |  |  | ✓ | x |   |  |  |  | ↓ |  | Fig. S2 |
|            | <i>tbx16</i> sib            | none             | <i>col1a2</i> |   |   |   |   |  |  |   |   |   |  |  |  | ✓ |  | Fig. 8B |
|            | <i>tbx16</i> sib            | <i>fgf4</i> mRNA | <i>col1a2</i> |   |   |   |   |  |  |   |   |   |  |  |  | ↓ |  | Fig. 8B |
|            | <i>tbx16</i> <sup>-/-</sup> | none             | <i>col1a2</i> |   |   |   |   |  |  |   |   |   |  |  |  | ↓ |  | Fig. 8B |
|            | <i>tbx16</i> <sup>-/-</sup> | <i>fgf4</i> mRNA | <i>col1a2</i> |   |   |   |   |  |  |   |   |   |  |  |  | ↓ |  | Fig. 8B |
|            | <i>tbx16</i> sib            | none             | <i>myh21</i>  |   |   |   |   |  |  | ↓ | ✓ |   |  |  |  | ↓ |  | Fig. 8B |
|            | <i>tbx16</i> sib            | <i>fgf4</i> mRNA | <i>myh21</i>  |   |   |   |   |  |  | ↓ | ✓ |   |  |  |  | ↓ |  | Fig. 8B |
|            | <i>tbx16</i> <sup>-/-</sup> | none             | <i>myh21</i>  |   |   |   |   |  |  | ↓ | ✓ |   |  |  |  | ↓ |  | Fig. 8B |
|            | <i>tbx16</i> <sup>-/-</sup> | <i>fgf4</i> mRNA | <i>myh21</i>  |   |   |   |   |  |  | x | x |   |  |  |  | x |  | Fig. 8B |

|     |                                       |
|-----|---------------------------------------|
| ✓   | present at normal levels              |
| x   | absent                                |
| ↓   | downregulated                         |
| ↓↓  | severely downregulated, still present |
| ↑   | upregulated                           |
| ↔   | mild expansion                        |
| ↔↔  | moderate expansion                    |
| ↔↔↔ | severe expansion                      |

- Bisgrove, B. W., Snarr, B. S., Emrazian, A. and Yost, H. J.** (2005). Polaris and Polycystin-2 in dorsal forerunner cells and Kupffer's vesicle are required for specification of the zebrafish left-right axis. *Dev Biol* **287**, 274-288.
- Feldman, B. and Stemple, D. L.** (2001). Morpholino phenocopies of *sqt*, *oep*, and *ntl* mutations. *Genesis* **30**, 175-177.
- Furthauer, M., Reifers, F., Brand, M., Thisse, B. and Thisse, C.** (2001). *sprouty4* acts in vivo as a feedback-induced antagonist of FGF signaling in zebrafish. *Development* **128**, 2175-2186.
- Haeussler, M., Zweig, A. S., Tyner, C., Speir, M. L., Rosenbloom, K. R., Raney, B. J., Lee, C. M., Lee, B. T., Hinrichs, A. S., Gonzalez, J. N., et al.** (2019). The UCSC Genome Browser database: 2019 update. *Nucleic Acids Res* **47**, D853-D858.
- Maroon, H., Walshe, J., Mahmood, R., Kiefer, P., Dickson, C. and Mason, I.** (2002). *Fgf3* and *Fgf8* are required together for formation of the otic placode and vesicle. *Development* **129**, 2099-2108.
